# Supplementary material for: cryo-EM structures of the E. coli replicative DNA polymerase reveal its dynamic interactions with the DNA sliding clamp, exonuclease and τ
Source: eLife journal article supplement (doi:10.7554/elife.11134), 2015-10-24
Supplement: supp [file elife-11134-supp-v1.zip]

**A***E. coli* Pol III $\alpha$ 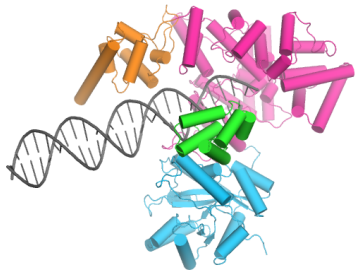**B***T. aquaticus* Pol III $\alpha$ 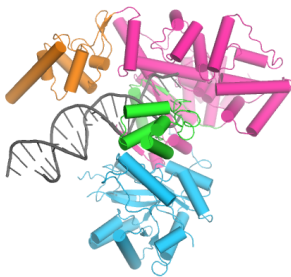**C***G. kaustophilus* PolC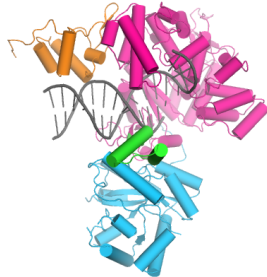

● PHP ● palm-fingers ● thumb ● tip-of-fingers domain ● tail
