# Supplementary figures and images for: cryo-EM structures of the E. coli replicative DNA polymerase reveal its dynamic interactions with the DNA sliding clamp, exonuclease and τ
Source: eLife journal article supplement (doi:10.7554/elife.11134), 2015-10-24

**A**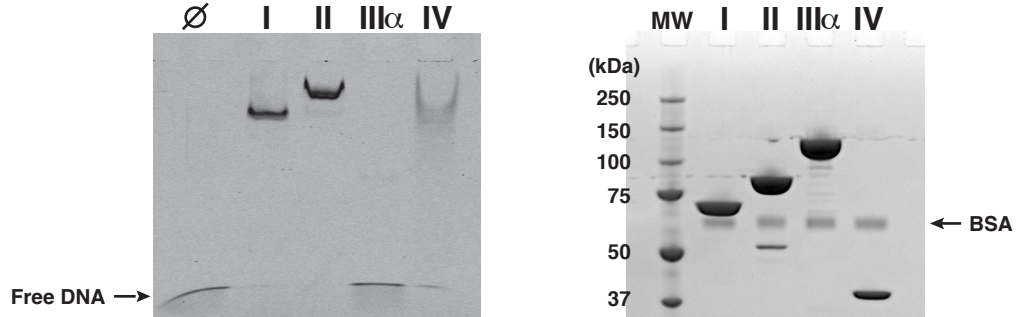**B**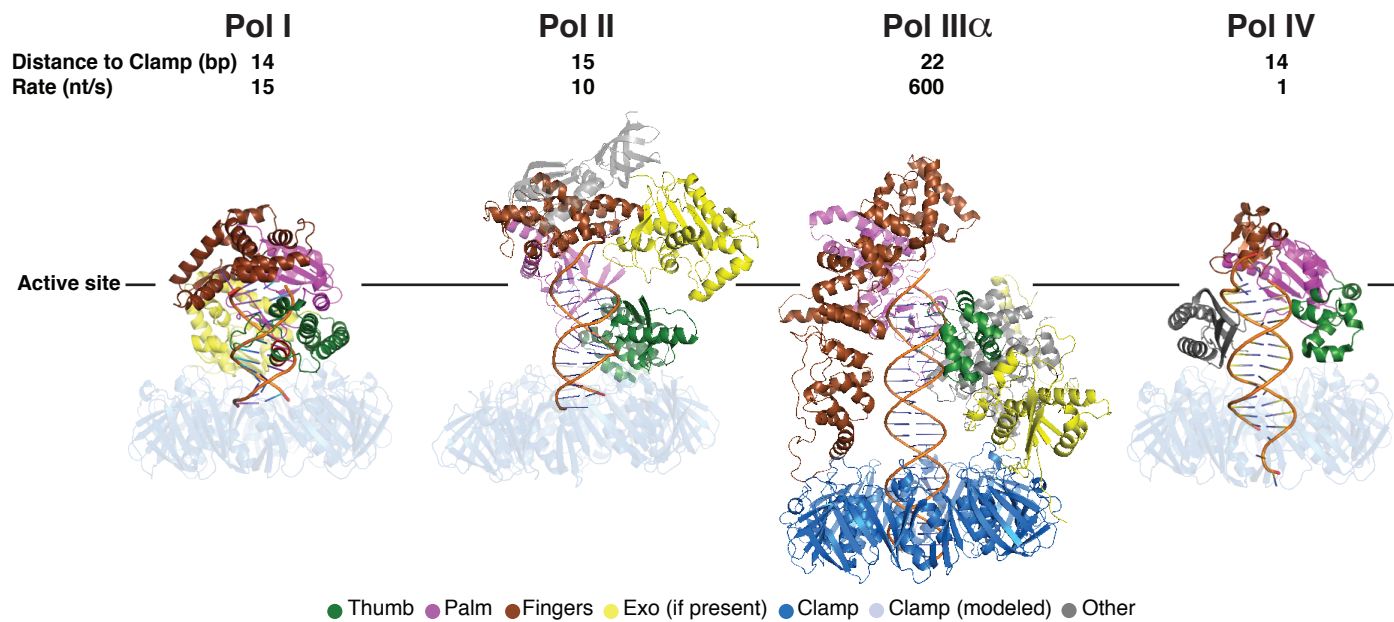**C**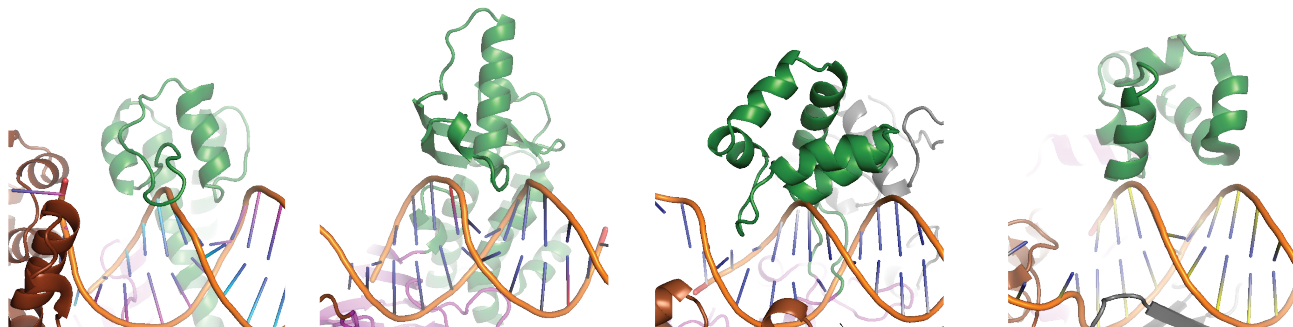

Supplement: supp [file elife-11134-supp-v1.zip]

**A**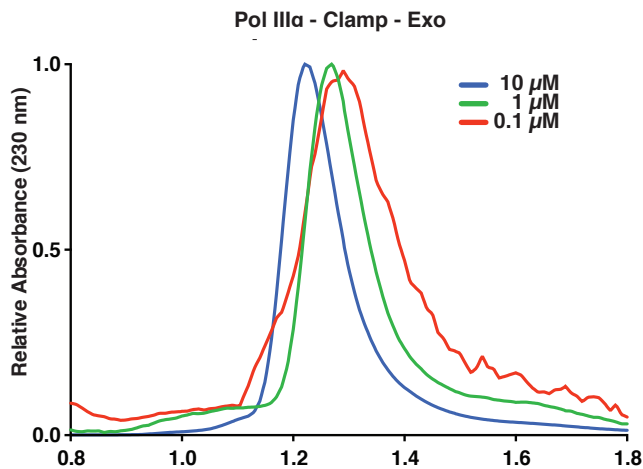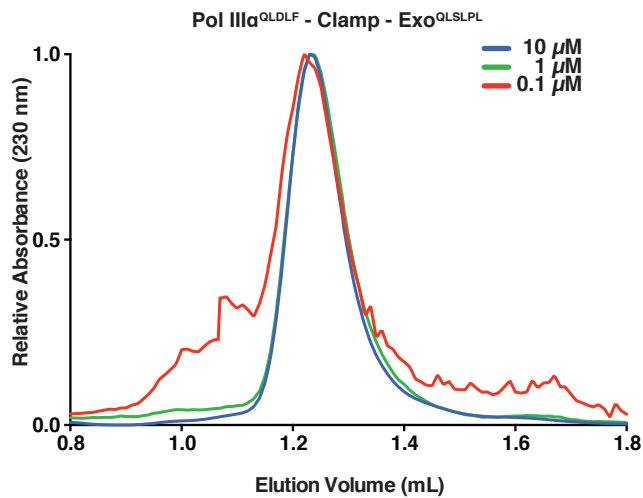

Supplement: supp [file elife-11134-supp-v1.zip]

**A***E. coli* Pol III $\alpha$  - DNA free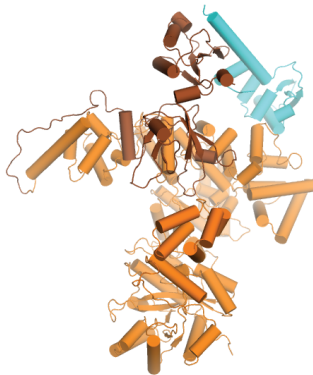**B***E. coli* Pol III $\alpha$  - DNA bound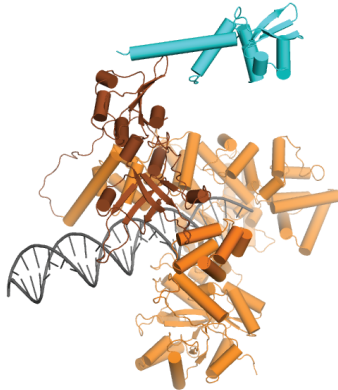**C***T. aquaticus* Pol III $\alpha$ 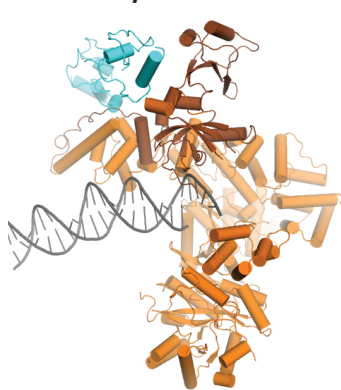

Supplement: supp [file elife-11134-supp-v1.zip]

**A**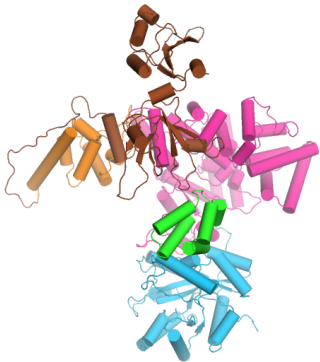**B**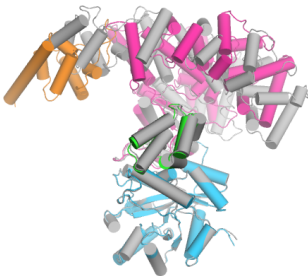**C**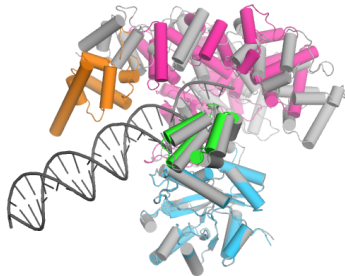

● PHP ● palm-fingers ● thumb ● tip-of-fingers domain ● tail

Supplement: supp [file elife-11134-supp-v1.zip]

**A**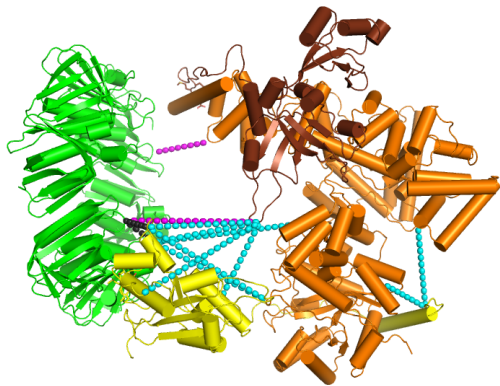**B**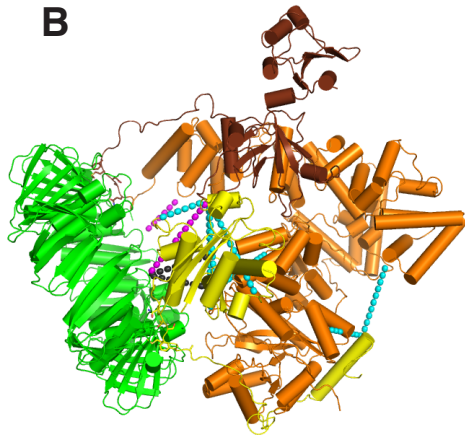

● Pol III $\alpha$    ● Pol III $\alpha$ -tail   ● Clamp   ● Exonuclease

Supplement: supp [file elife-11134-supp-v1.zip]

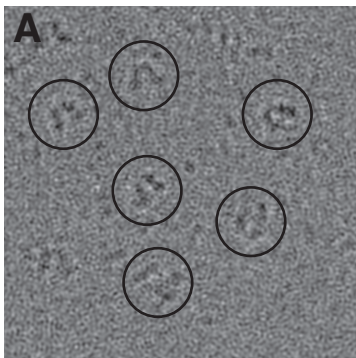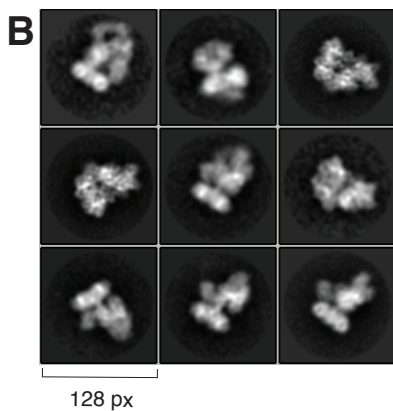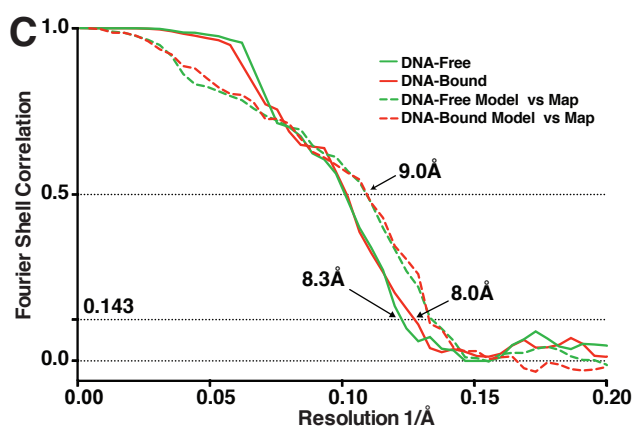

**D**

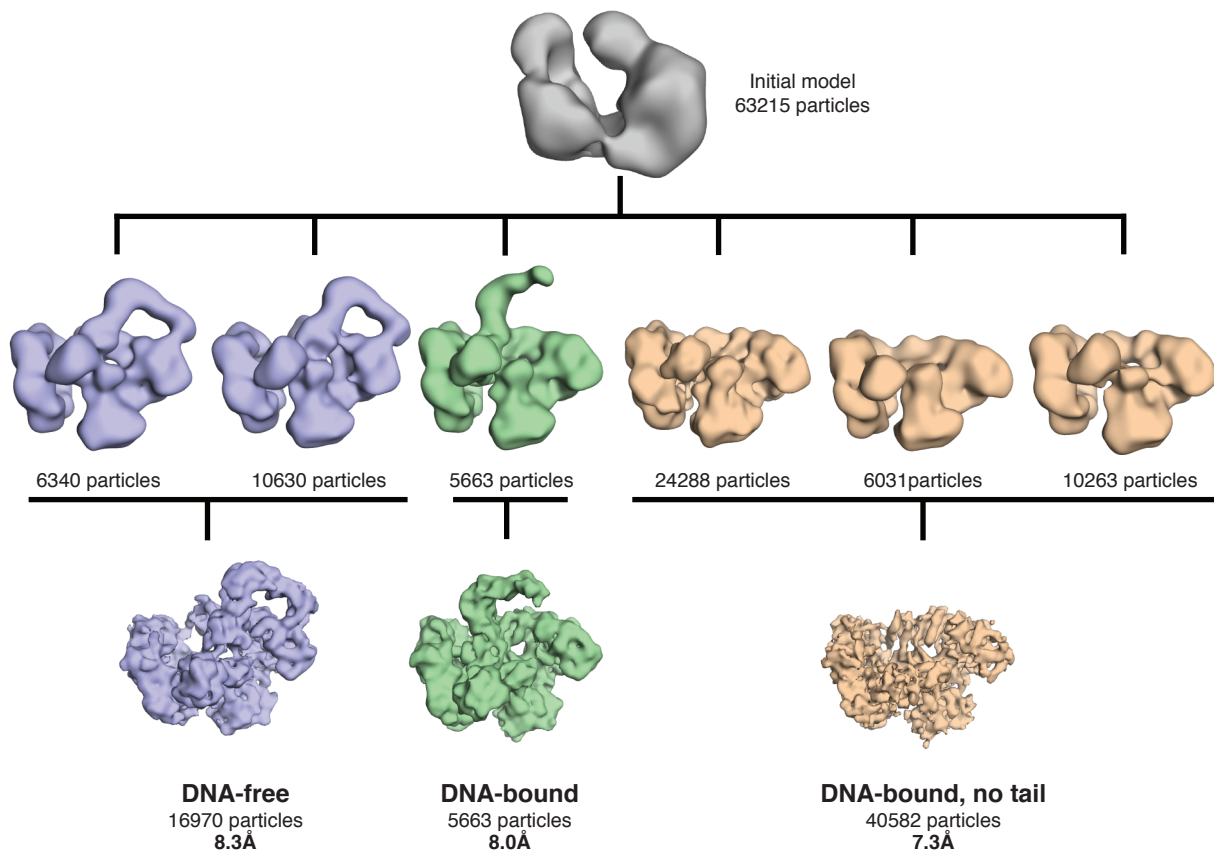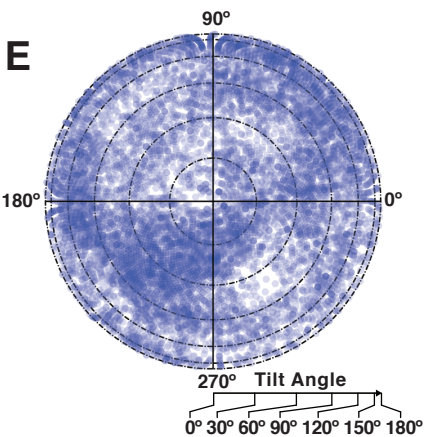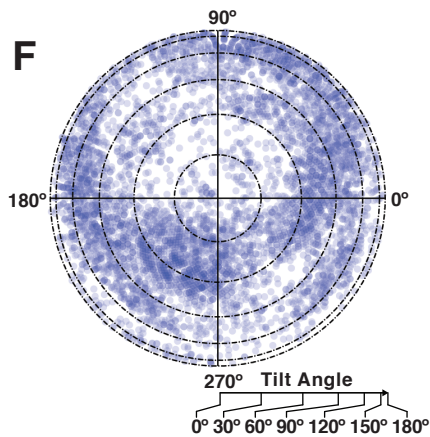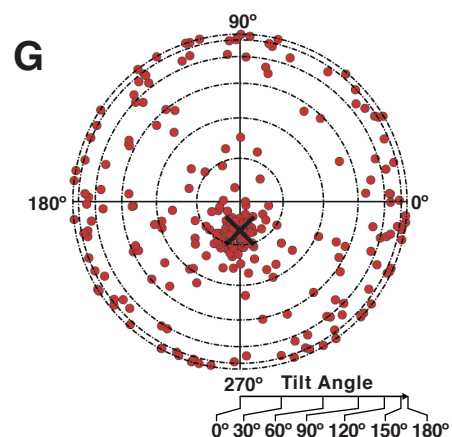

Supplement: supp [file elife-11134-supp-v1.zip]

**A**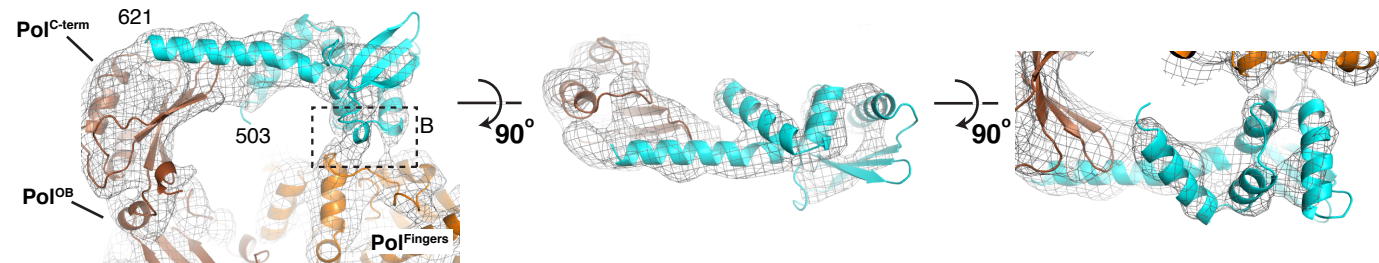**B**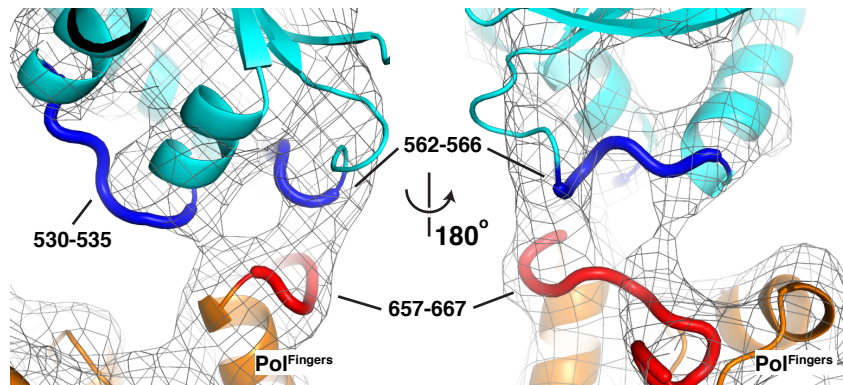

Supplement: supp [file elife-11134-supp-v1.zip]
